# Supplementary material for: A stable dual-emitting dye@LMOF luminescence probe for the rapid and visible detection of organophosphorous pesticides in aqueous media
Source: Royal Society of Chemistry journal article supplement (doi:10.1039/c9ce01846h), 2019-12-27
Supplement: c9ce01846h1.pdf [file c9ce01846h1.pdf]

## Supplementary information

# **A stable dual-emitting dye@LMOF luminescence probe for rapid and visible detection of organophosphorous pesticides in aqueous medium †**

Jie Zhang,<sup>a</sup> Wendi Zhou,<sup>a</sup> Lijun, Zhai,<sup>a</sup> Xiaoyan Niu,<sup>a</sup> and Tuoping Hu<sup>\*a</sup>

### X-ray crystallography

Diffraction data collections for **1** was finished on a Bruker Smart Apex II CCD area-detector diffractometer with graphite-monochromated Mo K $\alpha$  radiation ( $\lambda = 0.71073$  Å). The integration of the diffraction data as well as the intensity corrections for the Lorentz and polarization effects, was carried out using the SAINT program. Semi-empirical absorption correction was performed using SADABS program. The structure of **1** was solved by direct methods and all the non-hydrogen atoms were refined anisotropically on  $F^2$  by the full-matrix least-squares technique with olex. The hydrogen atoms except for those of water molecules were generated geometrically and refined isotropically using the riding model. Because the guest solvent molecules in MOF **1** are highly disordered and impossible to refine using conventional discrete-atom models, the SQUEEZE subroutine of the *PLATON* software suite was used to remove the scattering from the highly disordered solvent molecules. The formula of MOF **1** was obtained based on volume/count electron analysis, TGA and elemental analysis. The reported refinements are of the guest-free structures obtained by the SQUEEZE routine, and the results are attached to the CIF file. The details of the crystal data for **1** are summarized in Table S1, and selected bond lengths and angles are listed in Table S2 (ESI†).

Table S1 Crystal data and structure refinements for LMOF 1.

| MOF                                                                | LMOF 1                                                                         |
|--------------------------------------------------------------------|--------------------------------------------------------------------------------|
| Empirical formula                                                  | C <sub>78</sub> H <sub>46</sub> Cd <sub>3</sub> N <sub>4</sub> O <sub>18</sub> |
| Formula weight                                                     | 1664.39                                                                        |
| Crystal system                                                     | Triclinic                                                                      |
| Space group                                                        | <i>P</i> -1                                                                    |
| <i>a</i> (Å)                                                       | 11.143(6)                                                                      |
| <i>b</i> (Å)                                                       | 14.102(7)                                                                      |
| <i>c</i> (Å)                                                       | 16.934(9)                                                                      |
| $\alpha$ (°)                                                       | 105.376(8)                                                                     |
| $\beta$ (°)                                                        | 96.152(9)                                                                      |
| $\gamma$ (°)                                                       | 105.376(8)                                                                     |
| <i>V</i> (Å <sup>3</sup> )                                         | 2422(2)                                                                        |
| <i>Z</i>                                                           | 1                                                                              |
| <i>D<sub>c</sub></i> (g cm <sup>-3</sup> )                         | 1.141                                                                          |
| $\mu$ (mm <sup>-1</sup> )                                          | 0.707                                                                          |
| <i>F</i> (000)                                                     | 830.0                                                                          |
| Reflections collected                                              | 13452                                                                          |
| Independent reflections                                            | 9702                                                                           |
| Goodness-of-fit                                                    | 0.887                                                                          |
| R <sub>1</sub> <sup>a</sup> [ <i>I</i> > 2 $\sigma$ ( <i>I</i> )]  | 0.0477                                                                         |
| wR <sub>2</sub> <sup>b</sup> [ <i>I</i> > 2 $\sigma$ ( <i>I</i> )] | 0.1075                                                                         |
| CCDC number                                                        | 1960249                                                                        |

<sup>a</sup>R<sub>1</sub> =  $\sum ||F_o| - |F_c|| / \sum |F_o|$ . <sup>b</sup>wR<sub>2</sub> =  $\sqrt{\sum w(|F_o|^2 - |F_c|^2)| / \sum w(F_o)^2}^{1/2}$

Table S2 Crystal data and structure refinements for LMOF 1.

| LMOF 1                                |            |                                      |            |                                      |            |
|---------------------------------------|------------|--------------------------------------|------------|--------------------------------------|------------|
| Cd1-O1 <sup>1</sup>                   | 2.236(4)   | Cd1-O6 <sup>3</sup>                  | 2.292(3)   | Cd2-O7 <sup>2</sup>                  | 2.415(4)   |
| Cd1-O1                                | 2.236(4)   | Cd1-O9 <sup>4</sup>                  | 2.283(4)   | Cd2-O10 <sup>4</sup>                 | 2.186(4)   |
| Cd1-O6 <sup>2</sup>                   | 2.292(3)   | Cd1-O9 <sup>5</sup>                  | 2.283(4)   | Cd2-N1                               | 2.357(6)   |
| Cd2-O6 <sup>2</sup>                   | 2.339(3)   | Cd2-O2                               | 2.211(4)   | Cd2-N2                               | 2.340(5)   |
| O1 <sup>1</sup> -Cd1-O1               | 180.0      | O1-Cd1-O9 <sup>4</sup>               | 89.32(14)  | O9 <sup>5</sup> -Cd1-O6 <sup>3</sup> | 95.10(12)  |
| O1-Cd1-O6 <sup>2</sup>                | 90.37(13)  | O1-Cd1-O9 <sup>5</sup>               | 90.68(14)  | O9 <sup>5</sup> -Cd1-O6 <sup>2</sup> | 84.90(12)  |
| O1 <sup>1</sup> -Cd1-O6 <sup>3</sup>  | 90.37(13)  | O1 <sup>1</sup> -Cd1-O9 <sup>5</sup> | 89.32(14)  | O9 <sup>4</sup> -Cd1-O6 <sup>3</sup> | 84.90(12)  |
| O1 <sup>1</sup> -Cd1-O6 <sup>2</sup>  | 89.63(13)  | O6 <sup>3</sup> -Cd1-O6 <sup>2</sup> | 180.0      | O9 <sup>4</sup> -Cd1-O9 <sup>5</sup> | 180.0      |
| O1-Cd1-O6 <sup>3</sup>                | 89.63(13)  | O9 <sup>4</sup> -Cd1-O6 <sup>2</sup> | 95.10(12)  | O2-Cd2-O6 <sup>3</sup>               | 101.36(15) |
| O1 <sup>1</sup> -Cd1-O9 <sup>4</sup>  | 90.68(14)  | N1-Cd2-O7 <sup>3</sup>               | 94.99(19)  | O2-Cd2-O7 <sup>3</sup>               | 155.63(15) |
| O10 <sup>5</sup> -Cd2-O2              | 92.08(16)  | N2-Cd2-O7 <sup>3</sup>               | 87.09(14)  | O2-Cd2-N1                            | 88.0(2)    |
| O10 <sup>5</sup> -Cd2-O6 <sup>3</sup> | 111.11(15) | N2-Cd2-N1                            | 70.5(2)    | O2-Cd2-N2                            | 116.52(16) |
| O10 <sup>5</sup> -Cd2-O7 <sup>3</sup> | 94.70(16)  | O6 <sup>3</sup> -Cd2-N2              | 136.90(13) | O6 <sup>3</sup> -Cd2-O7 <sup>3</sup> | 54.42(12)  |
| O10 <sup>5</sup> -Cd2-N1              | 156.1(2)   | O10 <sup>5</sup> -Cd2-N2             | 88.30(18)  | O6 <sup>3</sup> -Cd2-N1              | 92.25(18)  |

Table S3. LoD and LoQ of RhB@LMOF **1** toward pesticides at room temperature.

| Analytes         | LoD                   | LoQ                   |
|------------------|-----------------------|-----------------------|
| parathion-methyl | $1.2 \times 10^{-5}$  | $3.9 \times 10^{-5}$  |
| parathion        | $0.43 \times 10^{-5}$ | $1.43 \times 10^{-5}$ |
| nitenpyram       | $5.36 \times 10^{-5}$ | $1.78 \times 10^{-6}$ |
| thiamethoxam     | $5.07 \times 10^{-5}$ | $1.69 \times 10^{-6}$ |
| carbaryl         | $5.98 \times 10^{-5}$ | $1.99 \times 10^{-6}$ |
| atrinze          | $1.05 \times 10^{-4}$ | $3.49 \times 10^{-5}$ |

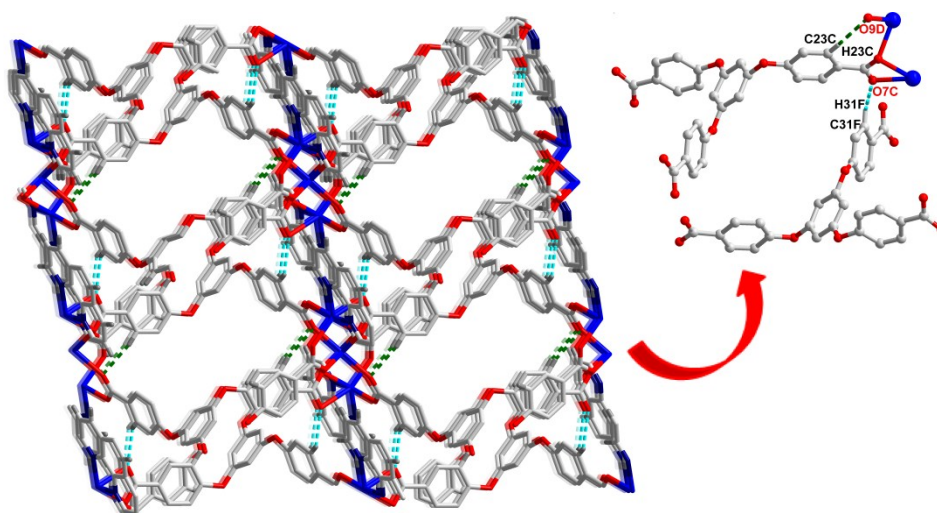

Fig. S1. The hydrogen bonds interaction between the 3D supermolecule structure of LMOF **1**.

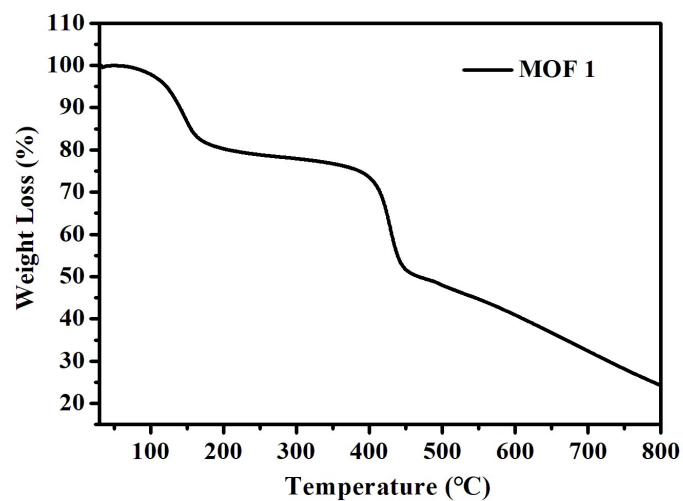

Fig. S2 The TG curve for LMOF **1**.

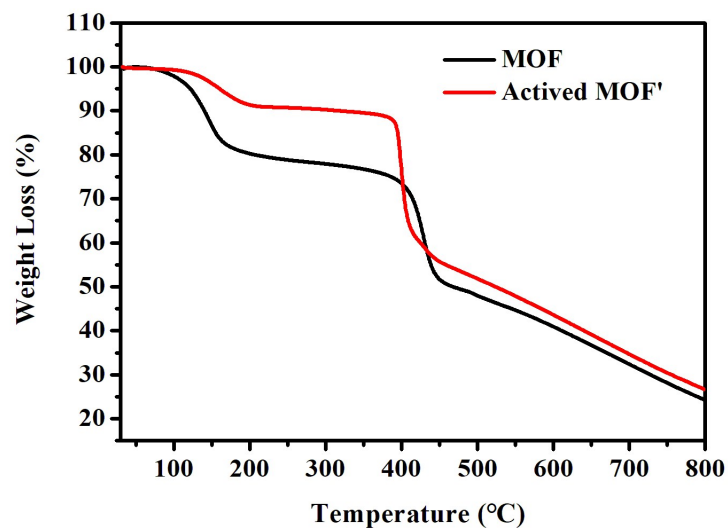

Fig. S3 The TG curve for activated LMOF 1'.

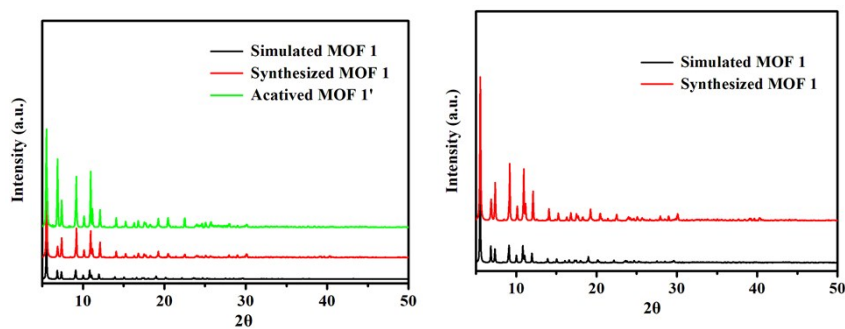

Fig. S4. The PXRD pattern for LMOF 1 and activated LMOF 1'.

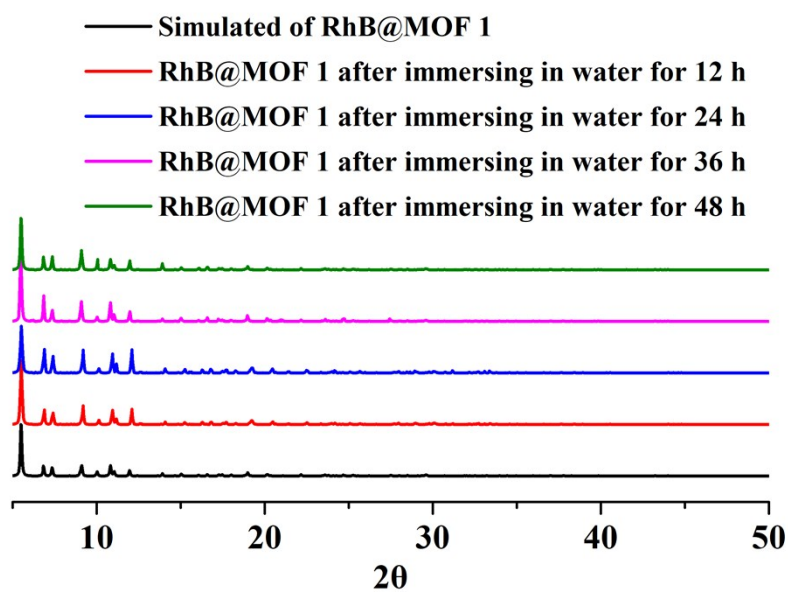

Fig. S5. The PXRD pattern for RhB@LMOF 1 after immersing in water for various times.

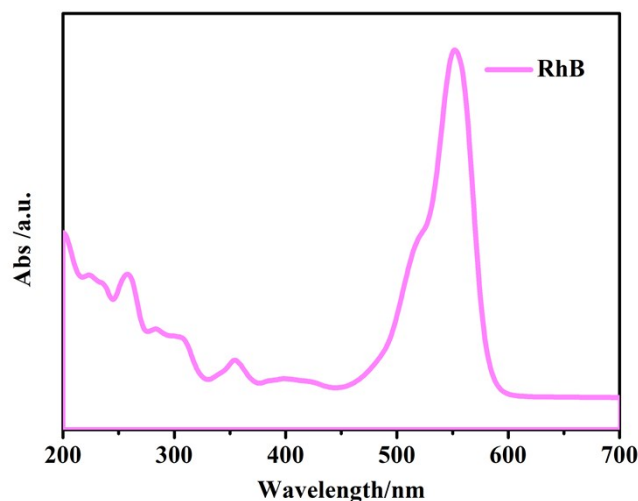

Fig. S6. The absorption spectrum for RhB under the UV-light.

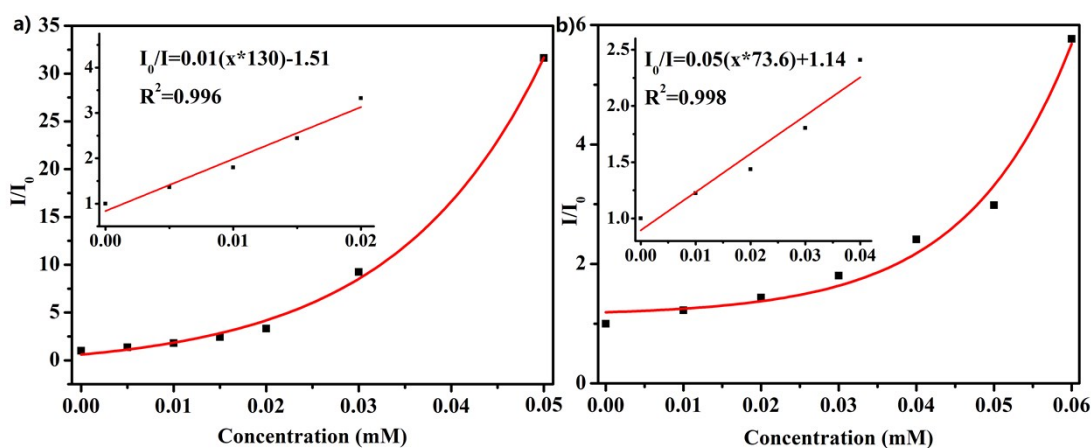

Fig. S7. The Ksv plot for the fluorescence quenching of parathion (a)/parathion-methyl (b)@RhB@LMOF 1 suspensions, inset the Ksv plot at low concentration.

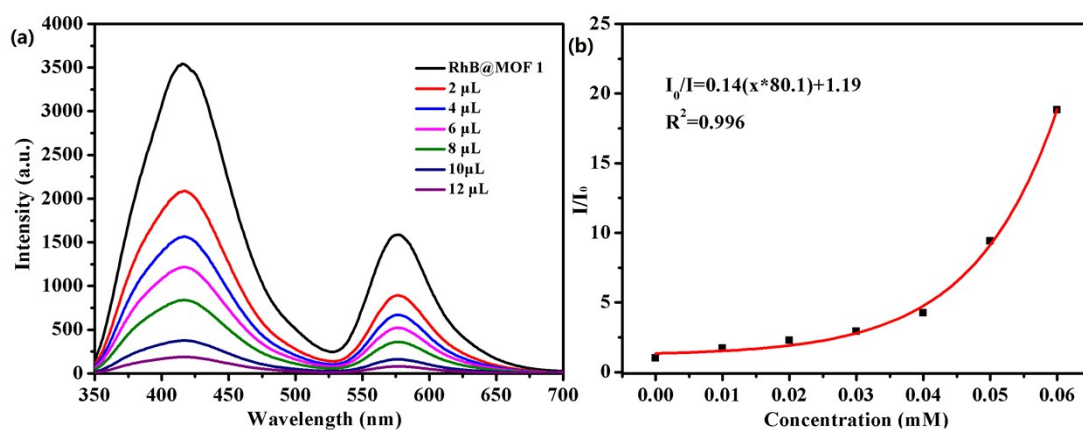

Fig. S8. Emission spectra for RhB@LMOF 1 with the addition of different concentrations of nitenpyram, The Ksv plot for the fluorescence quenching of nitenpyram@RhB@LMOF 1 suspension.

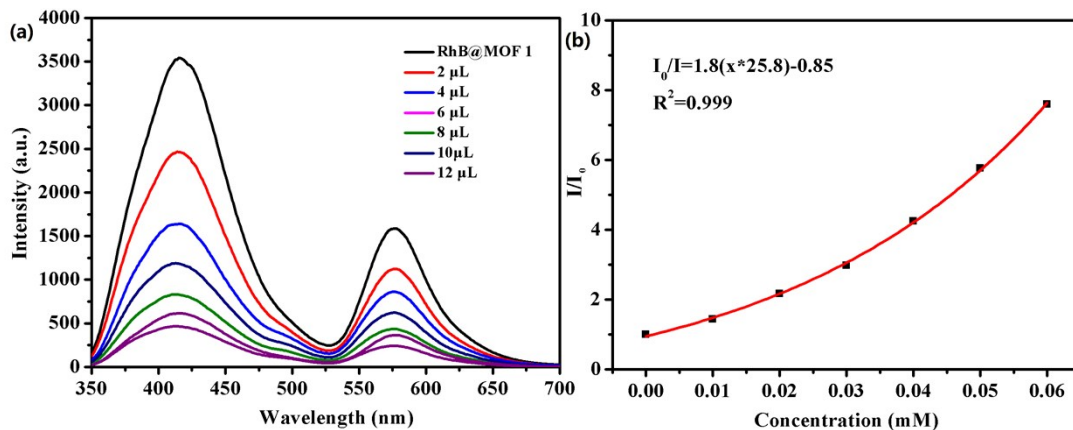

Fig. S9. Emission spectra for RhB@LMOF 1 with the addition of different concentrations of thiamethoxam, The Ksv plot for the fluorescence quenching of thiamethoxam @RhB@LMOF 1 suspension.

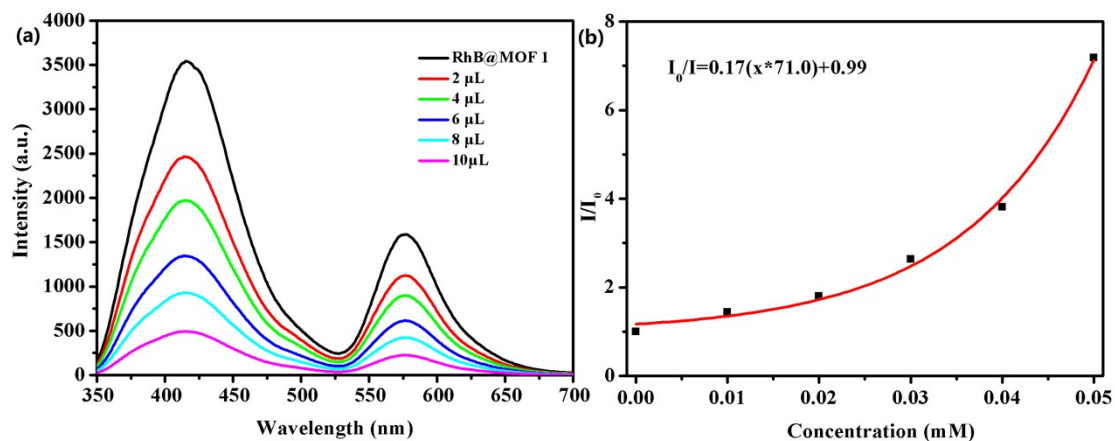

Fig. S10. Emission spectra for RhB@LMOF 1 with the addition of different concentrations of carbaryl, The Ksv plot for the fluorescence quenching of carbaryl@RhB@LMOF 1 suspension.

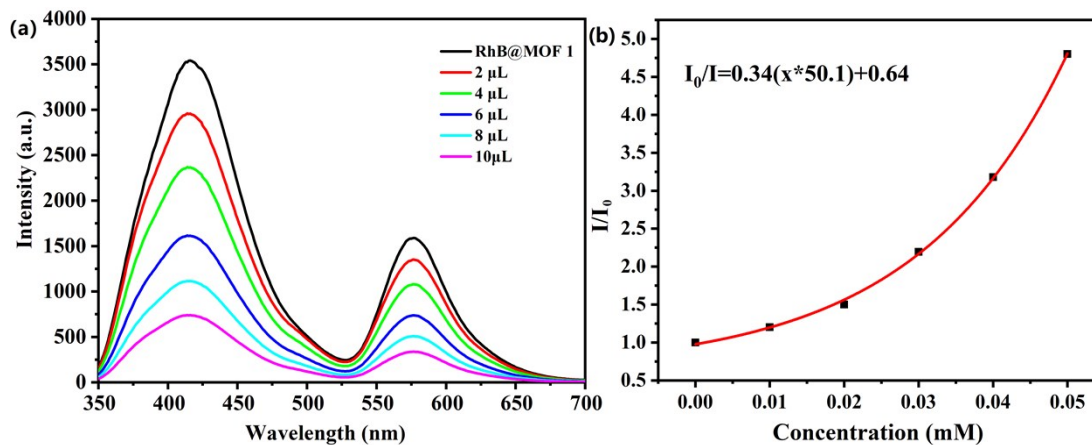

Fig. S11. Emission spectra for RhB@LMOF 1 with the addition of different concentrations of atrinze, The Ksv plot for the fluorescence quenching of atrinze@RhB@LMOF 1 suspension.

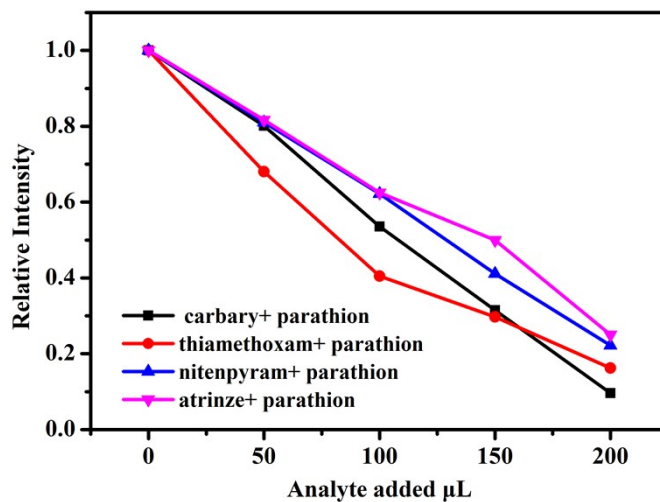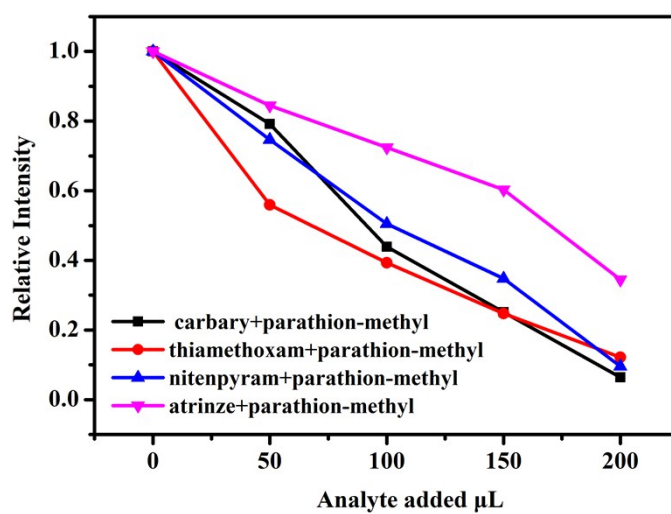

Fig. S12. The selective detection of parathion/parathion-methyl on RhB@LMOF **1** in the presence of carbary/thiamethoxam/nitenpyram/atrinze in water.

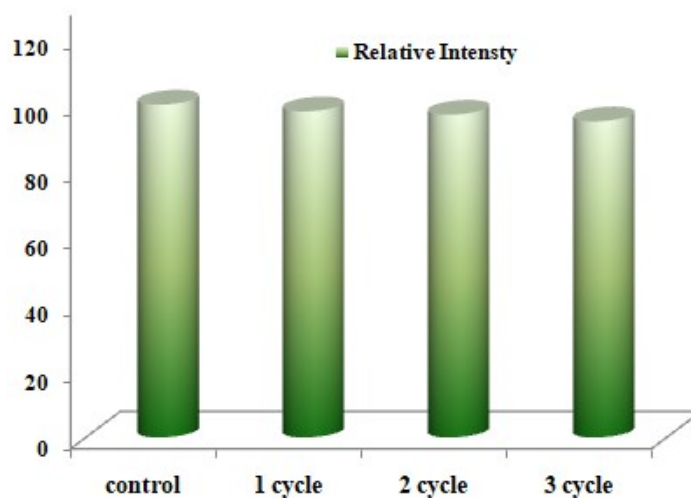

Fig. S13. The relative intensity of **1** after treated with parathion after three cycles.

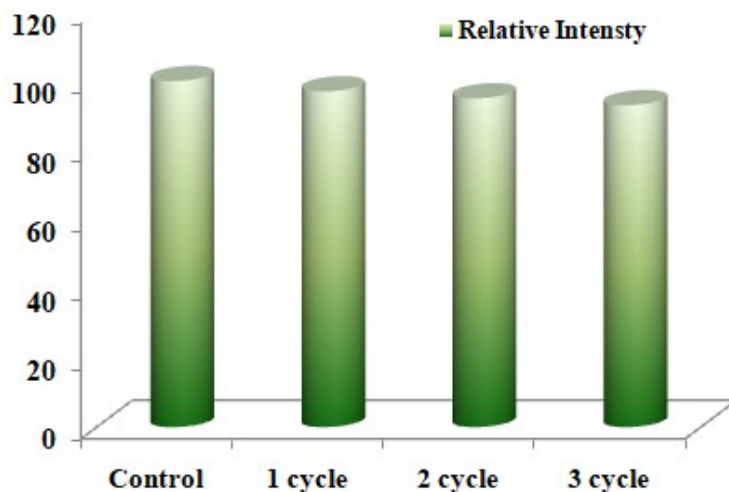

Fig. S14. The relative intensity of RhB@LMOF 1 after treated with parathion-methyl after three cycles.

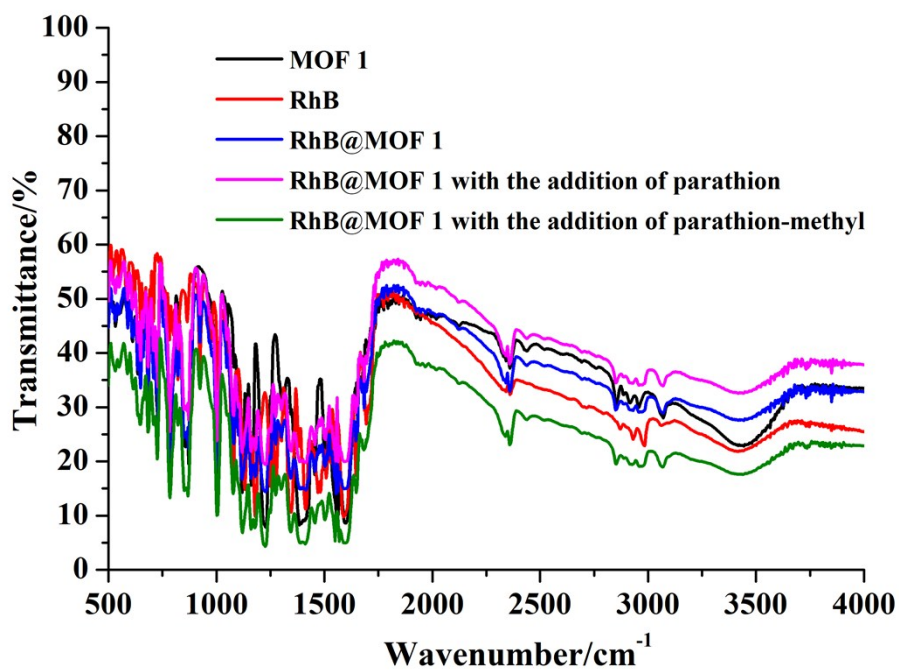

Fig. S15 The IR for RhB@LMOF 1 after the detecting experiment.



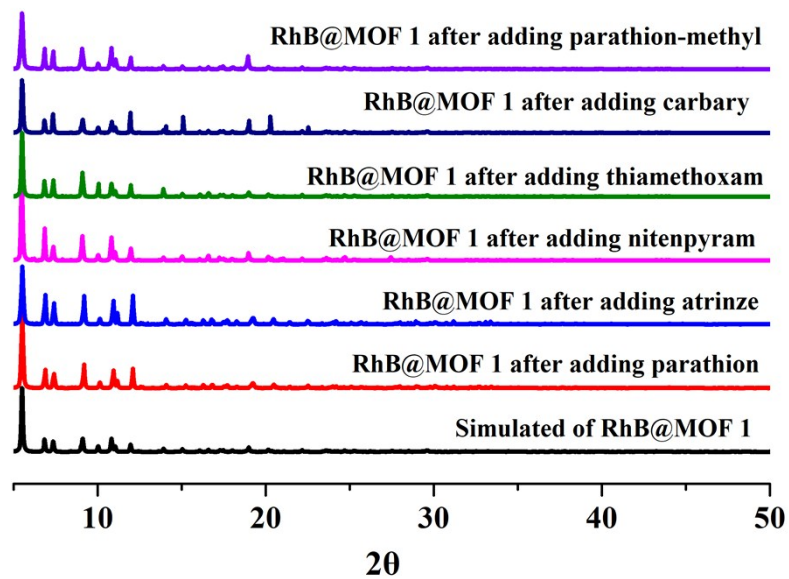

Fig. S16 The PXRD for RhB@LMOF 1 after the detecting experiment.

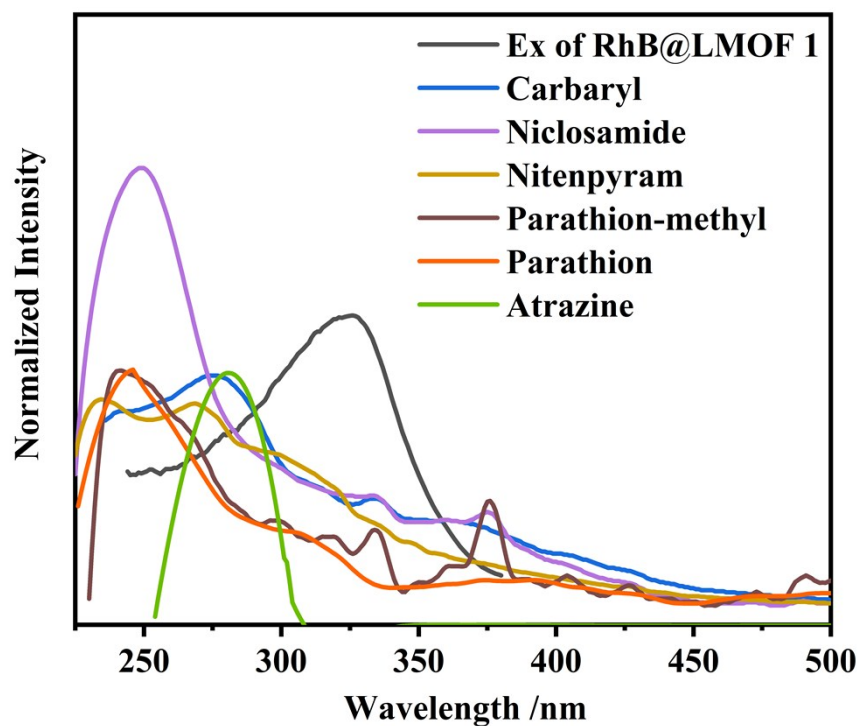

Fig. S17. The exaction spectrum of RhB@LMOF 1.
